# Supplementary material
Source: PubMed Central journal article supplement (PMC6103776)
Supplement: NIHMS983494-supplement-Figure_S1.pdf [file NIHMS983494-supplement-Figure_S1.pdf]

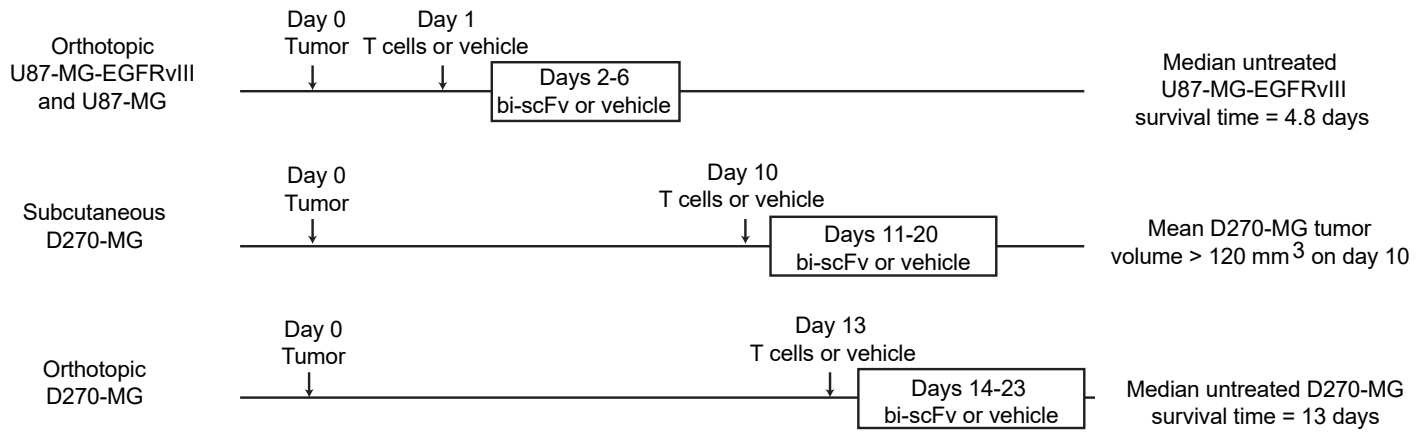

**Figure S1** – Schematic illustrating the timeline of tumor implantation, immune reconstitution, and bi-scFv treatment for the U87-MG-EGFRvIII, U87-MG, and D270 efficacy studies shown in Figure 7.
