# Supplementary material
Source: PubMed Central journal article supplement (PMC6103776)
Supplement: NIHMS983494-supplement-Table_S1.pdf [file NIHMS983494-supplement-Table_S1.pdf]

**Table S1** - Construct design, expression parameters and associated binding kinetic and purification yield outcomes for each of the constructs tested as part of this study.

| Construct number | Expression vector | Signal peptide <sup>a</sup>       | N-terminal (antibody clone and arrangement) | C-terminal (antibody clone and arrangement) | Inter-variable chain linker | Intra-variable chain linker          | Purification tag | Codon optimization | Equilibrium dissociation constant (K <sub>D</sub> ) for EGFRvIII | Equilibrium dissociation constant (K <sub>D</sub> ) for CD3-epsilon | Equilibrium dissociation constant (K <sub>D</sub> ) for EGFRwt | Purification yield |
|------------------|-------------------|-----------------------------------|---------------------------------------------|---------------------------------------------|-----------------------------|--------------------------------------|------------------|--------------------|------------------------------------------------------------------|---------------------------------------------------------------------|----------------------------------------------------------------|--------------------|
| 1                | pcDNA3.3 (+)      | Murine Ig kappa light chain       | 139 (VH-VL)                                 | 28F11 (VL-VH)                               | [Gly <sub>4</sub> -Ser]     | [Gly <sub>4</sub> -Ser] <sub>3</sub> | None             | No                 | No binding detected                                              | No binding detected                                                 | No binding detected                                            | Not assessed       |
| 2                | pcDNA3.3 (+)      | Murine Ig kappa light chain       | 139 (VL-VH)                                 | 28F11 (VL-VH)                               | [Gly <sub>4</sub> -Ser]     | [Gly <sub>4</sub> -Ser] <sub>3</sub> | None             | No                 | No binding detected                                              | No binding detected                                                 | No binding detected                                            | Not assessed       |
| 3                | pcDNA3.3 (+)      | Murine Ig kappa light chain       | 139 (VH-VL)                                 | 28F11 (VH-VL)                               | [Gly <sub>4</sub> -Ser]     | [Gly <sub>4</sub> -Ser] <sub>3</sub> | None             | No                 | 3.48 x 10 <sup>-6</sup> M                                        | 5.72 x 10 <sup>-6</sup> M                                           | No binding detected                                            | Not assessed       |
| 4                | pcDNA3.3 (+)      | Murine Ig kappa light chain       | 139 (VL-VH)                                 | 28F11 (VH-VL)                               | [Gly <sub>4</sub> -Ser]     | [Gly <sub>4</sub> -Ser] <sub>3</sub> | None             | No                 | 2.78 x 10 <sup>-8</sup> M                                        | 1.56 x 10 <sup>-8</sup> M                                           | No binding detected                                            | Not assessed       |
| 5                | pcDNA3.1 (+)      | Murine Ig kappa light chain       | 139 (VH-VL)                                 | 28F11 (VH-VL)                               | [Gly <sub>4</sub> -Ser]     | 218 <sup>b</sup>                     | None             | No                 | 8.68 x 10 <sup>-6</sup> M                                        | 9.45 x 10 <sup>-6</sup> M                                           | No binding detected                                            | 11 mg/L            |
| 6                | pcDNA3.1 (+)      | Murine Ig kappa light chain       | 139 (VL-VH)                                 | 28F11 (VH-VL)                               | [Gly <sub>4</sub> -Ser]     | 218 <sup>b</sup>                     | None             | No                 | 5.94 x 10 <sup>-7</sup> M                                        | 4.05 x 10 <sup>-7</sup> M                                           | No binding detected                                            | 13 mg/L            |
| 7                | pcDNA3.1 (+)      | Murine Ig kappa light chain       | 139 (VL-VH)                                 | 28F11 (VH-VL)                               | [Gly <sub>4</sub> -Ser]     | [Gly <sub>4</sub> -Ser] <sub>3</sub> | None             | Yes                | 2.78 x 10 <sup>-8</sup> M                                        | 1.56 x 10 <sup>-8</sup> M                                           | No binding detected                                            | 19 mg/L            |
| 8                | pcDNA3.1 (+)      | Human immunoglobulin light chain  | 139 (VL-VH)                                 | 28F11 (VH-VL)                               | [Gly <sub>4</sub> -Ser]     | [Gly <sub>4</sub> -Ser] <sub>3</sub> | None             | Yes                | 2.78 x 10 <sup>-8</sup> M                                        | 1.56 x 10 <sup>-8</sup> M                                           | No binding detected                                            | 22 mg/L            |
| 9                | pcDNA3.1 (+)      | Human serum albumin preproprotein | 139 (VL-VH)                                 | 28F11 (VH-VL)                               | [Gly <sub>4</sub> -Ser]     | [Gly <sub>4</sub> -Ser] <sub>3</sub> | None             | Yes                | 2.78 x 10 <sup>-8</sup> M                                        | 1.56 x 10 <sup>-8</sup> M                                           | No binding detected                                            | 25 mg/L            |

<sup>a</sup>Amino acid sequence for signal peptides: Murine Ig kappa light chain - MDMRAPAGIFGFLLVLPFGYRS; Human immunoglobulin light chain - MAWSPLFLTLTHCAGSWA; Human serum albumin preproprotein signal peptide - MKWVTFISLLFLFSSAYS.

<sup>b</sup>Amino acid sequence for: 218 Linker – GSTSGSGKPGSGEGSTKG.
