# Supplementary material
Source: PubMed Central journal article supplement (PMC6103776)
Supplement: NIHMS983494-supplement-Table_S2.pdf [file NIHMS983494-supplement-Table_S2.pdf]

**Table S2** - Glioma cell lines and patient derived tumor samples used for study with the number of EGFRvIII receptors per cell, the number of EGFRwt receptors per cell and the proportion of cells expressing EGFRvIII in the given cell line or tumor sample.

| <b>Glioma cell line</b>             | <b>EGFRvIII-positive cells (receptors / cell)</b> | <b>EGFRwt-positive cells (receptors / cell)</b> | <b>Proportion of cells expressing EGFRvIII (percent)</b> |
|-------------------------------------|---------------------------------------------------|-------------------------------------------------|----------------------------------------------------------|
| U87-MG-EGFRvIII                     | 1.0 - 3.7 x 10 <sup>5</sup>                       | 1.5 - 8.1 x 10 <sup>4</sup>                     | 100 +/- 0.0%                                             |
| U87-MG                              | 0                                                 | 0.76 - 4.2 x 10 <sup>4</sup>                    | 0 +/- 0.0%                                               |
| D54-MG-EGFRvIII                     | 3.2 - 6.4 x 10 <sup>5</sup>                       | 1.0 - 5.9 x 10 <sup>4</sup>                     | 100 +/- 0.0%                                             |
| D54-MG                              | 0                                                 | 2.6 - 4.9 x 10 <sup>4</sup>                     | 0 +/- 0.0%                                               |
| CT2A-MG-EGFRvIII                    | 2.3 - 5.9 x 10 <sup>5</sup>                       | 6.3 - 8.2 x 10 <sup>4</sup>                     | 100 +/- 0.0%                                             |
| CT2A-MG                             | 0                                                 | 5.2 - 7.7 x 10 <sup>4</sup>                     | 0 +/- 0.0%                                               |
| <b>Patient derived tumor sample</b> |                                                   |                                                 |                                                          |
| D270-MG                             | 6.3 - 9.2 x 10 <sup>5</sup>                       | 8.3 - 9.6 x 10 <sup>4</sup>                     | 77.8 +/- 3.61%                                           |
| D10-0319-MG                         | 3.2 - 6.8 x 10 <sup>5</sup>                       | 6.8 - 9.2 x 10 <sup>4</sup>                     | 73.6 +/- 1.58%                                           |
| D2159-MG                            | 1.8 - 5.5 x 10 <sup>6</sup>                       | 7.0 - 8.4 x 10 <sup>4</sup>                     | 83.6% +/- 2.18%                                          |
